# Supplementary material for: Phytochemical composition and in vitro antioxidant activities of Citrus sinensis peel extracts
Source: PeerJ. 2018 Aug 3;6:e5331. doi: 10.7717/peerj.5331 (PMC6078072; doi:10.7717/peerj.5331)
Supplement: Data S1 [file peerj-06-5331-s001.xlsx]

## Sheet: Sheet1
SAMPLE	DPPH		FRAP		ORAC
	mg TE/g		mmol Fe(II)/g		mol TE/g
	Mean	SEM	Mean	SEM	Mean	SEM
100% MEC	13.9623	1.08264	275.616	1.8483	0.730649	0.0496322
70% MEC	16.6861	1.20332	240.939	4.94546	0.698284	0.0418077
50% MEC	15.9833	1.32899	214.638	3.49084	0.563037	0.0306569
100% EEC	11.6066	0.821577	139.938	3.88682	0.462923	0.0330322
70% EEC	16.5222	1.2924	219.019	3.86833	0.676652	0.020477
50% EEC	15.9573	1.32369	194.731	5.80665	0.50213	0.0244258
70% AEC	18.2013	1.62394	296.607	7.96536	0.92081	0.034452
50% AEC	16.8698	1.30141	269.711	7.33094	0.597355	0.0230685
WEC	8.34643	1.13755	94.9966	2.11115	0.310993	0.0279928
